# Supplementary material for: Wetter und Suizid
Source: Springer Nature journal article supplement (doi:10.1007/s00115-019-00795-x), 2019-08-29
Supplement: MOESM1 [file 17116284]

| Tabelle 1: Untersuchungen zum Einfluss meteorologischer Variablen auf Suizidhandlungen auf Basis von Tagesdaten |                                                                               |                                     |                                                                                                                         |                                                      |                                                                |
|-----------------------------------------------------------------------------------------------------------------|-------------------------------------------------------------------------------|-------------------------------------|-------------------------------------------------------------------------------------------------------------------------|------------------------------------------------------|----------------------------------------------------------------|
|                                                                                                                 | <b>Autor/Jahr</b>                                                             | <b>Suizidversuch (SV)</b>           | <b>Meteorologische Variablen</b>                                                                                        | <b>Hauptergebnisse</b>                               | <b>Bemerkungen</b>                                             |
|                                                                                                                 | <b>Geographische Lage</b>                                                     | <b>Suizid (S)</b>                   |                                                                                                                         |                                                      |                                                                |
|                                                                                                                 | <b>Beobachtungszeitraum</b>                                                   | <b>Anzahl (n)</b>                   |                                                                                                                         |                                                      |                                                                |
| 1                                                                                                               | T Zerbini et al. [98]/2018<br><br>Sao Paulo, Brasilien<br><br>1 Jahr          | S (Suizid durch Erhängen)<br>n= 110 | Temperatur,<br>Niederschlag,<br>Bewölkung                                                                               | Positive Assoziation mit heißeren und helleren Tagen | Keine signifikanten Unterschiede zwischen Alter und Geschlecht |
| 2                                                                                                               | M Santurtun et al. [78]/2018<br><br>Catabria, Spanien<br><br>14 Jahre         | S<br>n= k.A.                        | Temperatur,<br>Sonnenstrahlung,<br>Wind (Geschwindigkeit, Richtung),<br>Luftfeuchtigkeit,<br>Bewölkung,<br>Niederschlag | Positive Assoziation mit Bewölkung                   |                                                                |
| 3                                                                                                               | JA Fernandez-Nino et al. [20]/2018<br><br>5 Städte, Kolumbien<br><br>11 Jahre | S<br>n= k.A.                        | Temperatur,<br>Niederschlag                                                                                             | Keine Assoziation.                                   |                                                                |
| 4                                                                                                               | PG Dixon, AJ Kalkstein [14]/2018<br><br>9 Counties, USA<br><br>35 Jahre       | S<br>n= k.A.                        | Temperatur                                                                                                              | Positive Assoziation mit Temperatur                  |                                                                |

|   |                                                                                     |                                                                       |                                                                 |                                                                                                                                                          |                                                                                                                                      |
|---|-------------------------------------------------------------------------------------|-----------------------------------------------------------------------|-----------------------------------------------------------------|----------------------------------------------------------------------------------------------------------------------------------------------------------|--------------------------------------------------------------------------------------------------------------------------------------|
| 5 | B Seregi et al. [79]/2017<br>Ungarn<br>35 Jahre                                     | S<br>n= 122.116                                                       | Sonnenstunden                                                   | Positive Assoziation mit Sonnenstunden am Indextag sowie mit mittleren Sonnenstunden in den vorausgehenden 11 Tagen.                                     | Sehr niedrige positive Assoziation nach Ausschluss saisonaler Variationen.                                                           |
| 6 | HJ Jee et al. [34]/2017<br>Südkorea<br>18 Jahre                                     | S<br>n= 170.823                                                       | Temperatur,<br>Sonnenstrahlung,<br>Luftfeuchtigkeit             | Positive Assoziation mit Temperatur, Sonnenstrahlung und Luftfeuchtigkeit                                                                                |                                                                                                                                      |
| 7 | T Akkaya-Kalayci et al. [2]/2017<br>Istanbul, Türkei<br>1 Jahr                      | SV<br>n= 2.131 (15-25-jährige)                                        | Temperatur,<br>Sonnenstunden,<br>Niederschlag                   | Positive Assoziation ausschließlich bei Frauen mit Temperatur am Indextag sowie mittlerer Temperatur in den vorausgehenden 10 Tagen.                     | Nach Korrektur saisonaler Effekte: positive Assoziation ausschließlich bei Männern mit mittlerer Temperatur in den letzten 10 Tagen. |
| 8 | Y Kim et al. [37]/2016<br>Südkorea, 19 Jahre<br>Japan, 39 Jahre<br>Taiwan, 14 Jahre | S<br>Südkorea<br>n=66.024<br>Taiwan<br>n=17.879<br>Japan<br>n=126.705 | Temperatur,<br>Luftfeuchtigkeit,<br>Luftdruck,<br>Sonnenstunden | Positive Assoziation mit Temperatur.<br>Keine Assoziation mit Sonnenstunden.                                                                             | Stärkster Effekt von Temperatur am Indextag oder Vortag.                                                                             |
| 9 | V Fernandez-Arteaga et al. [19]/2016<br>Tabasco, Mexico<br>7 Jahre                  | S<br>n= 1.357                                                         | Temperatur,<br>Niederschlag                                     | Positive Assoziation zwischen heißen und sehr heißen Tagen (Temperaturen zwischen 30°C - 40 °C) ohne Niederschlag und Suizid bei Männern durch Erhängen. |                                                                                                                                      |

|    |                                                                          |                                            |                                                                                                           |                                                                                                                                                                                                            |                                                                 |
|----|--------------------------------------------------------------------------|--------------------------------------------|-----------------------------------------------------------------------------------------------------------|------------------------------------------------------------------------------------------------------------------------------------------------------------------------------------------------------------|-----------------------------------------------------------------|
| 10 | MN Williams et al. [94]/2015<br>Neuseeland<br>20 Jahre                   | S<br>n= 9.984                              | Temperatur                                                                                                | Positive Assoziation mit Temperaturanomalien (1.8% mehr Suizide pro 1°C Temperaturanstieg).                                                                                                                |                                                                 |
| 11 | B Vyssoki et al. [90]/2014<br>Österreich<br>30 Jahre                     | S<br>n= 69.462                             | Sonnenstunden                                                                                             | Positive Assoziation mit Sonnenstunden für Indextag sowie für die 10 vorausgehenden Tage.<br><br>Negative Assoziation zwischen Sonnenstunden und Suizid für die 14-60 Tage vor Indextag.                   | Korrektur saisonaler Effekte ist erfolgt.                       |
| 12 | H Kadotani et al. [36]/2014<br>Japan (Tokyo, Kanagawa, Osaka)<br>5 Jahre | SV, S (Bahnsuizid)<br>n= 971               | Sonnenstunden                                                                                             | Keine Assoziation mit Sonnenstunden am Indextag.<br><br>Negative Assoziation mit Sonnenstunden an den 7 vorausgehenden Tagen.<br><br>Negative Assoziation mit Sonnenstunden an den 3 vorausgehenden Tagen. | Zusätzliche Analyse auf Basis von Monatsdaten (vgl. Tabelle 3). |
| 13 | J Holopainen et al. [31]/2014<br>Helsinki, Finnland<br>38 Jahre          | S<br>n= 7.760 (5.410 Männer, 2.350 Frauen) | Temperatur (Diurnal Temperature Range (DTR); Differenz zwischen täglichem Temperaturmaximum und -minimum) | Positive Assoziation mit Diurnal Temperature Range im Frühjahr bei Männern.<br><br>Keine Assoziation mit DTR bei Frauen.                                                                                   |                                                                 |

|    |                                                                                 |                   |                                                                                 |                                                                                                                                                                                 |  |
|----|---------------------------------------------------------------------------------|-------------------|---------------------------------------------------------------------------------|---------------------------------------------------------------------------------------------------------------------------------------------------------------------------------|--|
| 14 | L Hiltunen et al. [29]/2014<br>Finnland (Jyväskylä, Helsinki, Oulu)<br>37 Jahre | S<br>n= 10.802    | Temperatur                                                                      | Keine Assoziationen.                                                                                                                                                            |  |
| 15 | A Talaei et al. [82]/2014<br>Mashhad, Iran<br>1 Jahr                            | SV, S<br>n=k.A.   | Temperatur,<br>Luftfeuchtigkeit,<br>Luftdruck                                   | Keine Assoziationen.                                                                                                                                                            |  |
| 16 | AM Grjibovski et al. [26]/2013<br>Astana, Kasachstan<br>6 Jahre                 | S<br>n= 685       | Temperatur,<br>Luftfeuchtigkeit,<br>Luftdruck,<br>Windgeschwindigkeit           | Positive Assoziation mit mittlerer und maximaler gefühlter Temperatur.                                                                                                          |  |
| 17 | L Hiltunen et al. [30]/2012<br>Helsinki, Finnland<br>942 Tage                   | SV<br>n= 3.945    | Temperatur,<br>Niederschlag,<br>Sonnenstrahlung,<br>Sonnenstunden,<br>Luftdruck | Positive Assoziation mit Luftdruck bei Frauen.<br><br>Negative Assoziation mit Luftdruck bei Männern.<br><br>Keine Assoziationen mit Temperatur, Niederschlag, Sonnenstrahlung. |  |
| 18 | H Müller et al. [53]/2011<br>Mittelfranken, Deutschland<br>2884 Tage            | SV, S<br>n= 2.987 | Temperatur,<br>Sonnenstrahlung                                                  | Positive Assoziation mit Temperatur und Sonnenstrahlung am Indextag und am vorausgehenden Tag.                                                                                  |  |

|    |                                                                            |                   |                                                                                                    |                                                                                                                                 |                                                                                                                                       |
|----|----------------------------------------------------------------------------|-------------------|----------------------------------------------------------------------------------------------------|---------------------------------------------------------------------------------------------------------------------------------|---------------------------------------------------------------------------------------------------------------------------------------|
| 19 | V Likhvar et al. [47]/2011<br>Japan<br>24 Jahre                            | S<br>n= 501.950   | Temperatur,<br>Luftfeuchtigkeit,<br>Luftdruck,<br>Sonnenstunden                                    | Positive Assoziation mit Temperatur am<br>Indextag.<br><br>Keine Assoziation mit Luftfeuchtigkeit,<br>Luftdruck, Sonnenstunden. | Zunahme harter<br>Suizidmethoden mit<br>steigenden<br>Temperaturen.                                                                   |
| 20 | Y Kim et al. [38]/2011<br>Südkorea<br>5 Jahre                              | S<br>n= 49.451    | Temperatur,<br>Luftfeuchtigkeit,<br>Sonnenstunden                                                  | Positive Assoziation mit Temperatur am<br>Indextag.                                                                             | Mit Temperatur<br>einhergehendes höheres<br>Suizidrisiko für<br>männliches Geschlecht,<br>höheres Alter, geringerer<br>Bildungsstand. |
| 21 | M Kordic et al. [40]/2010<br>Mostar, Bosnien und<br>Herzegowina<br>3 Jahre | S, SV<br>n= 89    | Temperatur,<br>Luftfeuchtigkeit,<br>Luftdruck                                                      | Positive Assoziation mit Luftdruck.                                                                                             |                                                                                                                                       |
| 22 | LA Didyk et al. [11]/2010<br>Kiew, Ukraine<br>1 Jahr                       | S, SV<br>n= 1.036 | Luftdruck<br>(mean daily integral<br>amplitude of atmospheric<br>pressure fluctuations<br>(APF-A)) | Negative Assoziation mit niedrigen<br>Luftdruckschwankungen.                                                                    |                                                                                                                                       |
| 23 | K Toro et al. [85]/2009<br>Budapest, Ungarn<br>10 Jahre                    | S<br>n= 4.918     | Temperatur,<br>Luftfeuchtigkeit                                                                    | Positive Assoziation mit Temperatur.                                                                                            |                                                                                                                                       |

|    |                                                                    |                                            |                                                             |                                                                                                                                                     |                                                                                                                                                                                                                                     |
|----|--------------------------------------------------------------------|--------------------------------------------|-------------------------------------------------------------|-----------------------------------------------------------------------------------------------------------------------------------------------------|-------------------------------------------------------------------------------------------------------------------------------------------------------------------------------------------------------------------------------------|
| 24 | C Eisenbach et al. [18]/2008<br>Heidelberg, Deutschland<br>3 Jahre | SV (Parasuizid durch Vergiftung)<br>n= 691 | Temperatur,<br>Niederschlag,<br>Luftdruck,<br>Sonnenstunden | Positive Assoziation mit Niederschlag.                                                                                                              | Zusätzliche Analyse auf Basis von Monatsdaten (vgl. Tabelle 3).                                                                                                                                                                     |
| 25 | LA Page et al. [60]/2007<br>England, Wales<br>11 Jahre             | S<br>n= 53.623                             | Temperatur                                                  | Positive Assoziation mit Temperatur.                                                                                                                | Positive Assoziation mit Hitzewelle 1995.<br><br>Keine Assoziation mit Hitzewelle 2003.                                                                                                                                             |
| 26 | KA Nejar et al. [55]/2007<br>Sao Paulo, Brasilien<br>9 Jahre       | S<br>n= 3.984                              | Temperatur,<br>Sonnenstunden                                | Keine Assoziation.                                                                                                                                  |                                                                                                                                                                                                                                     |
| 27 | FC Papadopoulos et al. [61]/2005<br>Griechenland<br>10 Jahre       | S<br>n= 3.717                              | Sonnenstrahlung                                             | Keine Assoziation mit Sonnenstrahlung am Indextag.<br><br>Positive Assoziation mit Sonnenstrahlung am Vortag und während der 4 vorausgehenden Tage. | Sonnenstrahlung während des 6. Tages vor Indextag geht mit signifikant niedrigerem Suizidrisiko einher.<br><br>Geschlechterunterschiede: längere Expositionszeit von Sonnenstrahlung bis Suizid bei Männern im Vergleich zu Frauen. |

|    |                                                                             |                                |                                                                                                                                                                                     |                                                                                                                                                                                                       |  |
|----|-----------------------------------------------------------------------------|--------------------------------|-------------------------------------------------------------------------------------------------------------------------------------------------------------------------------------|-------------------------------------------------------------------------------------------------------------------------------------------------------------------------------------------------------|--|
| 28 | T Partonen et al. [62]/2004<br><br>Finnland<br><br>1 Jahr                   | S<br>n= 1.397                  | Temperatur,<br>Sonnenstunden,<br>Sonnenstrahlung,<br>Bewölkung,<br>Wind (Richtung,<br>Geschwindigkeit)                                                                              | Positive Assoziation mit Sonnenstrahlung,<br>negative Assoziation mit Temperatur im<br>Frühjahr.<br><br>Positive Assoziation mit Schwankungen der<br>Sonnenstrahlung und mit Temperatur im<br>Sommer. |  |
| 29 | EA Deisenhammer et al.<br>[10]/2003<br><br>Tirol, Österreich<br><br>6 Jahre | S<br>n= 702                    | Temperatur,<br>Niederschlag,<br>Luftfeuchtigkeit,<br>Schwüle,<br>Luftdruck,<br>Schneefall,<br>Niederschlag,<br>Bewölkung,<br>Gewitter,<br>Nebel,<br>Wind (Geschwindigkeit),<br>Föhn | Positive Assoziation am Indextag mit<br>Temperatur, Gewitter und niedrige<br>Luftfeuchtigkeit, sowie Gewitter am<br>vorausgehenden Tag.                                                               |  |
| 30 | A Geltzer et al. [24]/2000<br><br>Washington State, USA<br><br>15 Jahre     | SV (CO Intoxikation)<br>n= 264 | Temperatur,<br>Sonnenstunden,<br>Niederschlag                                                                                                                                       | Positive Assoziation mit abnehmender<br>Temperatur und mit Niederschlagsmenge in<br>den vorausgehenden 7 Tagen                                                                                        |  |
| 31 | G Jessen et al. [35]/1998<br><br>Funen, Dänemark<br><br>24 Jahre            | S<br>n= k.A.                   | Temperatur,<br>Sonnenstunden,<br>Sichtweite,<br>Luftdruck,<br>Niederschlag,<br>Luftfeuchtigkeit,<br>Wind (Geschwindigkeit,<br>Richtung)                                             | Assoziation mit mehreren Wettervariablen,<br>stärkste Assoziation mit Luftfeuchtigkeit.                                                                                                               |  |

|    |                                                                                                            |                          |                                                                                                                                             |                                                                                                                                                                                      |  |
|----|------------------------------------------------------------------------------------------------------------|--------------------------|---------------------------------------------------------------------------------------------------------------------------------------------|--------------------------------------------------------------------------------------------------------------------------------------------------------------------------------------|--|
| 32 | YT Wang et al. [92]/1997<br><br>Innere Mongolei<br><br>6 Jahre                                             | S<br>n= 205              | Temperatur,<br>Luftdruck                                                                                                                    | Positive Assoziation mit extrem hohen und tiefen Temperaturen sowie mit extrem hohem und tiefem Luftdruck                                                                            |  |
| 33 | E Salib, N Gray [77]/1997<br><br>North Cheshire, UK<br><br>5 Jahre                                         | S<br>n= 197              | Temperatur,<br>Niederschlag,<br>Sonnenstunden,<br>Luftfeuchtigkeit,<br>,signifikante<br>Wetterereignisse' (z.B.<br>Gewitter, Hagel, Schnee) | Positive Assoziation mit Sonnenstunden am Indextag.<br><br>Positive Assoziation mit Sonnenstunden und mit täglichen Temperaturschwankungen am vorausgehenden Tag.                    |  |
| 34 | E Salib [76]/1997<br><br>North Cheshire, UK<br><br>5 Jahre                                                 | S<br>n= 47 (Alter >= 65) | Temperatur,<br>Niederschlag,<br>Sonnenstunden,<br>Luftfeuchtigkeit,<br>,signifikante<br>Wetterereignisse' (z.B.<br>Gewitter, Hagel, Schnee) | Positive Assoziation mit Sonnenstunden am Indextag.<br><br>Positive Assoziation mit Sonnenstunden und mit Luftfeuchtigkeit am vorausgehenden Tag.                                    |  |
| 35 | GH Tietjen, DF Kripke [84]/1994<br><br>L.A. County und Sacramento County, Kalifornien, USA<br><br>10 Jahre | S<br>n= k.A.             | Temperatur,<br>Sonnenstunden,<br>Bewölkung                                                                                                  | Positive Assoziation mit Phasen mit unterdurchschnittlichen Sonnenstunden in Sacramento County.<br><br>Keine Assoziation in L.A. County.                                             |  |
| 36 | A Barker et al. [5]/1994<br><br>Oxford, UK<br><br>14 Jahre                                                 | SV<br>n= 12.379          | Temperatur,<br>Sonnenstunden,<br>Niederschlag,<br>Bewölkung,<br>Sichtweite,<br>Wind (Geschwindigkeit),<br>Luftdruck                         | Positive Assoziation mit Bewölkung und Temperatur (Minimum und Maximum) bei Frauen.<br><br>Positive Assoziation mit Niederschlag, Wind, Bewölkung und geringe Sichtweite in Männern. |  |



|    |                                                                           |                                 |                                                                                                                                                    |                                                                                                                                              |  |
|----|---------------------------------------------------------------------------|---------------------------------|----------------------------------------------------------------------------------------------------------------------------------------------------|----------------------------------------------------------------------------------------------------------------------------------------------|--|
| 37 | LP Chiu [9]/1988<br><br>Hong Kong<br><br>1 Jahr                           | SV<br>n= 307                    | Temperatur,<br>Sonnenstunden,<br>Luftfeuchtigkeit,<br>Niederschlag                                                                                 | Keine Assoziation.                                                                                                                           |  |
| 38 | H-WM Breuer et al. [6]/1986<br><br>Düsseldorf, Deutschland<br><br>4 Jahre | SV, S<br>(Vergiftung)<br>n= 151 | >46 Wettervariablen in<br>verschiedenen Kategorien,<br>u.a. „Wetterart“, „bodennahe<br>Atmosphäre“,<br>„Wetterveränderung“,<br>„Nebel“, „Gewitter“ | Positive Assoziationen mit stabilem und<br>labilem Aufgleiten, Nebel, Gewitter.<br><br>Negative Assoziationen mit Tiefdruck und<br>Troglage. |  |
| 39 | HW Breuer et al. [7]/1984<br><br>Düsseldorf, Deutschland<br><br>3 Jahre   | SV<br>n= 151                    | Diverse Wettervariablen                                                                                                                            | Positive Assoziation mit Nebel, Gewitter,<br>Warmluft und Aufgleiten;<br><br>Negative Assoziationen mit Tiefdruck und<br>Troglage            |  |
| 40 | KW Dixon, MD Shulman<br>[13]/1983<br><br>New York, USA<br><br>6 Jahre     | S<br>n= 4.187                   | Temperatur,<br>Bewölkung,<br>Niederschlag,<br>Kalt-/Warm-/Okklusionsfront                                                                          | Keine Assoziation.                                                                                                                           |  |
| 41 | O Grove, J Lynge [27]/1979<br><br>Nuuk, Grönland<br><br>1 Jahr            | SV, S<br>n= 73                  | Temperatur,<br>Luftdruck,<br>Niederschlag,<br>Wind (Geschwindigkeit)                                                                               | Keine Assoziation.                                                                                                                           |  |

|    |                                                                                 |                        |                                                                                                                                                                |                                                                                                                                                                                                                                                       |  |
|----|---------------------------------------------------------------------------------|------------------------|----------------------------------------------------------------------------------------------------------------------------------------------------------------|-------------------------------------------------------------------------------------------------------------------------------------------------------------------------------------------------------------------------------------------------------|--|
| 42 | M Gostynski et al. [25]/1975<br><br>Polen (Warschau, Lodz, Posen)<br><br>1 Jahr | S<br>n= 460            | Gestörtes Hoch,<br>Nahes Tief,<br>Wetterfronten<br>(Mehrfrontigkeit,<br>Okklusionsfront, Warmfront,<br>Kaltfront, stationäre Fronten,<br>Luftmassenänderungen) | Positive Assoziationen mit Mehrfrontigkeit<br>am Indextag.<br><br>Positive Assoziation mit gestörtem Hoch,<br>nahem Tief, Okklusionsfront am<br>vorausgehenden Tag.                                                                                   |  |
| 43 | SW Tromp, JJ Bouma<br>[86]/1973<br><br>Niederlande<br><br>16 Jahre              | SV, S<br>n= 6.401      | Nicht spezifiziert                                                                                                                                             | Keine Assoziation mit einzelnen<br>meteorologischen Variablen (Temperatur,<br>Windgeschwindigkeit, Sonnenstunden).<br><br>Positive Assoziation von Clustertagen mit<br>drastischen Temperaturveränderungen,<br>starkem Wind und starkem Niederschlag. |  |
| 44 | EF Flosz [21]/1970<br><br>Kreis Wernigerode (Harz),<br>DDR<br><br>10 Jahre      | S<br>n= 254            | Temperatur,<br>Luftfeuchtigkeit,<br>Luftdruck                                                                                                                  | Positive Assoziation mit Temperatur.<br><br>Negative Assoziation mit Luftfeuchtigkeit.                                                                                                                                                                |  |
| 45 | AD Pokorny [66]/1966<br><br>Houston, Texas, USA<br><br>1 Jahr                   | SV, n= 373<br>S, n= 91 | Kreuztabellierung zwischen<br>Luftdruck und Luftfeuchtigkeit                                                                                                   | Keine Assoziation.                                                                                                                                                                                                                                    |  |

|    |                                                                           |                        |                                                                                                                                                                                      |                                                                                                                                                                                                                  |  |
|----|---------------------------------------------------------------------------|------------------------|--------------------------------------------------------------------------------------------------------------------------------------------------------------------------------------|------------------------------------------------------------------------------------------------------------------------------------------------------------------------------------------------------------------|--|
| 46 | E Digon, HB Bock [12]/1966<br><br>Philadelphia, USA<br><br>2 Jahre        | S<br>n= 527            | Temperatur,<br>Luftdruck,<br>Luftfeuchtigkeit,<br>Bewölkung,<br>Wolkenbasis,<br>Sichtweite,<br>Niederschlag,<br>Nebel,<br>Gewitter                                                   | Positive Assoziation mit starken<br>Luftdruckschwankungen.<br><br>Signifikant weniger Suizide bei<br>Kreuztabellierung zwischen Luftdruck und<br>Luftfeuchtigkeit (bei mittleren Werten für<br>beide Variablen). |  |
| 47 | AD Pokorny et al. [67]/1963<br><br>Houston, Texas, USA<br><br>1 Jahr      | SV, n= 373<br>S, n= 67 | Temperatur,<br>Luftdruck,<br>Wind (Geschwindigkeit,<br>Richtung)<br>Luftfeuchtigkeit,<br>Niederschlag,<br>Nebel,<br>Gewitter,<br>Bewölkung,<br>Sichtweite,<br>Hauptwolkenuntergrenze | Keine Assoziation.                                                                                                                                                                                               |  |
| 48 | H Patscheider [64]/1958<br><br>Innsbruck, Österreich<br><br>30 Jahre      | VS<br>n= 468           | Föhn                                                                                                                                                                                 | Keine Assoziation.                                                                                                                                                                                               |  |
| 49 | Jl Obersteg, B Marzetta<br>[57]/1957<br><br>Basel, Schweiz<br><br>5 Jahre | S<br>n= 261            | Warmfront,<br>Kaltfront,<br>Okklusion                                                                                                                                                | Keine Assoziation.                                                                                                                                                                                               |  |

| Tabelle 2: Untersuchungen zum Einfluss meteorologischer Variablen auf Suizidhandlungen auf Basis mittlerer Wochendaten |                                                                                                  |                    |                                                                                                     |                                                                                                                                                                                                                                  |                                                                                                                                                                                                                                                                                   |
|------------------------------------------------------------------------------------------------------------------------|--------------------------------------------------------------------------------------------------|--------------------|-----------------------------------------------------------------------------------------------------|----------------------------------------------------------------------------------------------------------------------------------------------------------------------------------------------------------------------------------|-----------------------------------------------------------------------------------------------------------------------------------------------------------------------------------------------------------------------------------------------------------------------------------|
|                                                                                                                        | Autor/Jahr                                                                                       | Suizidversuch (SV) | Meteorologische Variablen                                                                           | Hauptergebnisse                                                                                                                                                                                                                  | Bemerkungen                                                                                                                                                                                                                                                                       |
|                                                                                                                        | Geographische Lage                                                                               | Suizid (S)         |                                                                                                     |                                                                                                                                                                                                                                  |                                                                                                                                                                                                                                                                                   |
|                                                                                                                        | Beobachtungszeitraum                                                                             | Anzahl (n)         |                                                                                                     |                                                                                                                                                                                                                                  |                                                                                                                                                                                                                                                                                   |
| 1                                                                                                                      | DH Bando et al. [4]/2017<br><br>Sao Paulo, Brasilien<br><br>757 Wochen                           | S<br>n= 6.600      | Temperatur,<br>Sonnenstunden,<br>Sonnenstrahlung<br>Luftfeuchtigkeit,<br>Luftdruck,<br>Niederschlag | Positive Assoziationen mit Temperatur (Minimum, Maximum) am Indextag: Suizidrisiko steigt um 2.28% mit jedem 1 °C.<br><br>Stärkste Effekte zeigten sich bei Männern:<br>Suizidrisiko steigt um 2.37% mit jedem 1 °C bei Männern. | Weitere Ergebnisse:<br><br>Positive Assoziation mit Luftfeuchtigkeit an lag 3 (insgesamt und nur bei Männern).<br><br>Negative Assoziation mit Sonnenstunden an lag 2-4 (insgesamt und nur bei Männern).<br><br>Positive Assoziation mit Niederschlag am Indextag nur bei Frauen. |
| 2                                                                                                                      | PG Dixon et al. [16]/2014<br><br>Toronto, Canada<br>24 Jahre<br><br>Mississippi, USA<br>27 Jahre | S<br>n= 10.772     | Temperatur                                                                                          | Positive Assoziation mit höherer Temperatur.<br><br>Negative Assoziation mit niedrigerer Temperatur.                                                                                                                             |                                                                                                                                                                                                                                                                                   |

|   |                                               |                                      |                                                                                                                |                                                                                                                                   |                                                    |
|---|-----------------------------------------------|--------------------------------------|----------------------------------------------------------------------------------------------------------------|-----------------------------------------------------------------------------------------------------------------------------------|----------------------------------------------------|
| 3 | M Maes et al. [50]/1994<br>Belgien<br>9 Jahre | S (und<br>Tötungsdelikte)<br>n= k.A. | Temperatur,<br>Sonnenstunden,<br>Luftfeuchtigkeit,<br>Luftdruck,<br>Wind<br>(Geschwindigkeit),<br>Niederschlag | Positive Assoziationen mit Temperatur,<br>Sonnenstunden und Temperaturerhöhung.<br><br>Negative Assoziation mit Luftfeuchtigkeit. | Ergebnisse gelten nur für harte<br>Suizidmethoden. |
|---|-----------------------------------------------|--------------------------------------|----------------------------------------------------------------------------------------------------------------|-----------------------------------------------------------------------------------------------------------------------------------|----------------------------------------------------|

| Tabelle 3: Untersuchungen zum Einfluss meteorologischer Variablen auf Suizidhandlungen auf Basis mittlerer Monatsdaten |                                                            |                    |                                                                                                                                                                                    |                                                                                                                                                                                                |                                                                                                                                                                                                                                         |
|------------------------------------------------------------------------------------------------------------------------|------------------------------------------------------------|--------------------|------------------------------------------------------------------------------------------------------------------------------------------------------------------------------------|------------------------------------------------------------------------------------------------------------------------------------------------------------------------------------------------|-----------------------------------------------------------------------------------------------------------------------------------------------------------------------------------------------------------------------------------------|
|                                                                                                                        | Autor/Jahr                                                 | Suizidversuch (SV) | Meteorologische Variablen                                                                                                                                                          | Hauptergebnisse                                                                                                                                                                                | Bemerkungen                                                                                                                                                                                                                             |
|                                                                                                                        | Geographische Lage                                         | Suizid (S)         |                                                                                                                                                                                    |                                                                                                                                                                                                |                                                                                                                                                                                                                                         |
|                                                                                                                        | Beobachtungszeitraum                                       | Anzahl (n)         |                                                                                                                                                                                    |                                                                                                                                                                                                |                                                                                                                                                                                                                                         |
| 1                                                                                                                      | M Asirdizer et al. [3]/2018<br><br>Türkei<br><br>10 Jahre  | S<br>n= 29.865     | Temperatur (Winter Mean Temperature (WMT), Summer Mean Temperature (SMT) and Temperature Difference between January and July (TDJJ)), Niederschlag (Rainfall Activity Index (RAI)) | Kein signifikanter Effekt mit Niederschlag.<br><br>Positive Assoziation mit WMT bei Frauen.<br><br>Kein signifikanter Effekt SMT.<br><br>Positive Assoziation mit TDJJ bei Frauen und Männern. | Positive Assoziation bei „härteren“ Temperaturunterschieden zwischen Winter und Sommer bei Frauen (> 25 °C).<br><br>Positive Assoziation mit „moderaten“ Temperaturunterschieden zwischen Sommer und Winter bei Männern (20 °C - 25°C). |
| 2                                                                                                                      | GD Makris et al. [51]/2016<br><br>Schweden<br><br>12 Jahre | S<br>n= 12.448     | Sonnenstunden                                                                                                                                                                      | Positive Assoziation mit Sonnenstunden.                                                                                                                                                        |                                                                                                                                                                                                                                         |

|   |                                                                                                                                   |                        |                                                                              |                                                                                                                                                                                                                     |                                          |
|---|-----------------------------------------------------------------------------------------------------------------------------------|------------------------|------------------------------------------------------------------------------|---------------------------------------------------------------------------------------------------------------------------------------------------------------------------------------------------------------------|------------------------------------------|
| 3 | <p>RA White et al. [93]/2015</p> <p>Griechenland<br/>1992–2001</p> <p>Australien<br/>1990–1998</p> <p>Norwegen<br/>1969– 2009</p> | <p>S<br/>n= 31.060</p> | <p>Sonnenstunden</p>                                                         | <p>Keine signifikante Assoziation nach<br/>Ausschluss saisonaler Effekte.</p>                                                                                                                                       |                                          |
| 4 | <p>X Qi et al. [73]/2015</p> <p>Australien</p> <p>20 Jahre</p>                                                                    | <p>S<br/>n= 28.501</p> | <p>Temperatur,<br/>Sonnenstunden,<br/>Niederschlag,<br/>Luftfeuchtigkeit</p> | <p>Positive Assoziation mit Temperaturdifferenz<br/>zwischen Indexmonat und Vormonat.</p> <p>Keine konsistenten Assoziationen mit<br/>weiteren meteorologischen Variablen.</p>                                      |                                          |
| 5 | <p>M Kurokouchi et al.<br/>[41]/2015</p> <p>Tokyo, Japan</p> <p>5 Jahre</p>                                                       | <p>S<br/>n= 9.960</p>  | <p>Temperatur,<br/>Sonnenstunden,<br/>Luftfeuchtigkeit,<br/>Luftdruck</p>    | <p>Positive Assoziationen zwischen Temperatur<br/>sowie Luftfeuchtigkeit und Suizid bei<br/>Männern durch Ertrinken.</p> <p>Negative Assoziation zwischen Luftdruck und<br/>Suizid bei Männern durch Ertrinken.</p> | <p>Stratifikation nach Suizidmethode</p> |

|   |                                                                          |                              |                                                                                                       |                                                                                                                                                                                                                                                                                                                          |                                                                |
|---|--------------------------------------------------------------------------|------------------------------|-------------------------------------------------------------------------------------------------------|--------------------------------------------------------------------------------------------------------------------------------------------------------------------------------------------------------------------------------------------------------------------------------------------------------------------------|----------------------------------------------------------------|
| 6 | YW Wu et al. [95]/2014<br>Keelung City, Taiwan<br>5 Jahre                | S<br>n= k.A.                 | Temperatur,<br>Sonnenstunden,<br>Luftdruck,<br>Luftfeuchtigkeit,<br>Niederschlag,<br>Anzahl Regentage | Negative Assoziation mit Temperatur (Suizide insgesamt).<br><br>Negative Assoziationen mit Temperatur, Luftdruck, Regentagen bei Männern.<br><br>Negative Assoziationen mit Temperatur sowie Luftdruck (weiche Suizide).<br><br>Keine Assoziation mit Suiziden bei Frauen.<br><br>Keine Assoziation mit harten Suiziden. |                                                                |
| 7 | H Kadotani et al. [36]/2014<br>Japan (Tokyo, Kanagawa, Osaka)<br>5 Jahre | SV, S (Bahnsuizid)<br>n= 971 | Sonnenstunden                                                                                         | Keine Assoziation mit Sonnenstunden im Monat des Suizids sowie im vorausgehenden Monat.                                                                                                                                                                                                                                  | Zusätzliche Analyse auf Basis von Tagesdaten (vgl. Tabelle 1). |
| 8 | B Vyssoki et al. [91]/2012<br>Österreich<br>20 Jahre                     | S<br>n= 16.673               | Sonnenstunden                                                                                         | Positive Assoziation mit Sonnenstunden (harte Suizidmethoden).                                                                                                                                                                                                                                                           | Keine Assoziation mit weichen Suizidmethoden.                  |
| 9 | JF Tsai, W Cho [89]/2012<br>Taiwan<br>20 Jahre                           | S<br>n= 55.362               | Temperatur,<br>Niederschlag,<br>Sonnenstunden                                                         | Positive Assoziation mit Temperatur (Suizide insgesamt).<br><br>Negative Assoziation mit Niederschlag (Suizide insgesamt und bei Männern; nicht bei Frauen)                                                                                                                                                              |                                                                |



|    |                                                                    |                                               |                                                                                            |                                                                                                                                                            |                                                                    |
|----|--------------------------------------------------------------------|-----------------------------------------------|--------------------------------------------------------------------------------------------|------------------------------------------------------------------------------------------------------------------------------------------------------------|--------------------------------------------------------------------|
| 10 | AC Yang et al. [97]/2011<br>Taipei, Taiwan<br>18 Jahre             | S<br>n= 4.857                                 | Temperatur,<br>Sonnenstunden,<br>Luftdruck,<br>Luftfeuchtigkeit,<br>Wind (Geschwindigkeit) | Positive Assoziation mit Temperatur.<br><br>Negative Assoziation mit Sonnenstunden.                                                                        |                                                                    |
| 11 | R Ruuhela et al. [75]/2009<br>Finnland<br>35 Jahre                 | S<br>n= 43.393                                | Temperatur,<br>Sonnenstunden,<br>Sonnenstrahlung,<br>Niederschlag                          | Schwache positive Assoziationen mit geringer<br>Sonnenstrahlung und mit Temperatur.<br><br>Stärkere Effekte auf Basis von Jahresdaten<br>(vgl. Tabelle 4). | Zusätzliche Analyse auf Basis von<br>Jahresdaten (vgl. Tabelle 4). |
| 12 | X Qi et al. [74]/2009<br>Queensland, Australien<br>5 Jahre         | S<br>n= 2.445                                 | Temperatur,<br>Niederschlag                                                                | Positive Assoziation mit Temperatur<br>(Maximum).                                                                                                          |                                                                    |
| 13 | HC Lin et al. [48]/2008<br>Taiwan<br>7 Jahre                       | S<br>n= 18.130                                | Temperatur,<br>Luftfeuchtigkeit,<br>Luftdruck,<br>Niederschlag,<br>Sonnenstunden           | Positive Assoziation mit Temperatur (harte<br>Suizidmethoden)                                                                                              |                                                                    |
| 14 | C Eisenbach et al. [18]/2008<br>Heidelberg, Deutschland<br>3 Jahre | SV (Parasuizid durch<br>Vergiftung)<br>n= 691 | Temperatur,<br>Niederschlag,<br>Luftdruck,<br>Sonnenstunden                                | Positive Assoziation mit Niederschlag                                                                                                                      | Zusätzliche Analyse auf Basis von<br>Tagesdaten (vgl. Tabelle 1).  |
| 15 | A Preti et al. [70]/2007<br>Italien<br>30 Jahre                    | S<br>n= 97.693                                | Temperatur                                                                                 | Inkonsistente Ergebnisse.                                                                                                                                  |                                                                    |

|    |                                                                 |                 |                                                                                  |                                                                                                                                                               |                                                                                                                            |
|----|-----------------------------------------------------------------|-----------------|----------------------------------------------------------------------------------|---------------------------------------------------------------------------------------------------------------------------------------------------------------|----------------------------------------------------------------------------------------------------------------------------|
| 16 | PG Dixon et al. [15]/2007<br><br>USA<br><br>11 Jahre            | S<br>n= 3.355   | Temperatur                                                                       | Keine Assoziationen.                                                                                                                                          |                                                                                                                            |
| 17 | V Ajdacic-Gross et al. [1]/2007<br><br>Schweiz<br><br>120 Jahre | S<br>n= 128.322 | Temperatur,<br>Sonnenstunden,<br>Niederschlag                                    | Positive Assoziation mit Temperatur.<br><br>Inkonsistente Ergebnisse für Sonnenstunden und Niederschlag.                                                      |                                                                                                                            |
| 18 | R Oravec et al. [59]/2006<br><br>Slowenien<br><br>14 Jahre      | S<br>n= k.A.    | Temperatur,<br>Sonnenstunden,<br>Niederschlag                                    | Positive Assoziation mit Temperatur und Sonnenstunden (1985-1993).<br><br>Negative Assoziation mit Temperatur in den drei vorausgehenden Monaten (1985-1993). | Ab 1994 keine signifikanten Assoziationen. Laut Autoren infolge zunehmender Pharmakotherapie mit Antidepressiva seit 1994. |
| 19 | HC Lee et al. [43]/2006<br><br>Taiwan<br><br>7 Jahre            | S<br>n= 18.083  | Temperatur,<br>Luftfeuchtigkeit,<br>Luftdruck,<br>Niederschlag,<br>Sonnenstunden | Positive Assoziation mit Temperatur.                                                                                                                          |                                                                                                                            |
| 20 | T Partonen et al. [63]/2004<br><br>Finnland<br><br>153 Monate   | S<br>n= 1.658   | Temperatur,<br>Bewölkung,<br>Luftdruck,<br>Wind (Geschwindigkeit,<br>Richtung)   | Keine Assoziation.                                                                                                                                            |                                                                                                                            |

|    |                                                                        |                |                                                                                                   |                                                                                                                                                                                                |                                         |
|----|------------------------------------------------------------------------|----------------|---------------------------------------------------------------------------------------------------|------------------------------------------------------------------------------------------------------------------------------------------------------------------------------------------------|-----------------------------------------|
| 21 | S Nakaji et al. [54]/2004<br>Japan<br>30 Jahre                         | S<br>n= k.A.   | Temperatur                                                                                        | Keine Assoziation.                                                                                                                                                                             |                                         |
| 22 | G Lambert et al. [42]/2003<br>State of Victoria, Australien<br>9 Jahre | S<br>n= 5.706  | Temperatur,<br>Luftdruck,<br>Niederschlag,<br>Sonnenstunden                                       | Positive Assoziation mit Sonnenstunden.                                                                                                                                                        |                                         |
| 23 | Z Doganay et al. [17]/2003<br>Türkei<br>6 Jahre                        | SV<br>n= 1.119 | Temperatur,<br>Luftfeuchtigkeit,<br>Sonnenstunden,<br>Sonnenstrahlung,<br>Bewölkung,<br>Luftdruck | Positive Assoziationen mit Luftfeuchtigkeit,<br>Temperatur, Sonnenstunden und<br>Sonnenstrahlung.<br><br>Negative Assoziation mit atmosphärischem<br>Luftdruck und Bewölkung.                  |                                         |
| 24 | E Petridou et al. [65]/2002<br>20 Länder weltweit<br>4 - 24 Jahre      | S<br>n= k.A.   | Sonnenstunden                                                                                     | Positive Assoziation mit Sonnenstunden.                                                                                                                                                        |                                         |
| 25 | CM Leung et al. [46]/2002<br>Hong Kong<br>4 Jahre                      | S<br>n= 3.166  | Temperatur,<br>Luftfeuchtigkeit                                                                   | Positive Assoziation mit sinkender<br>Temperatur (CO Vergiftung durch<br>Verbrennung von Kohle).<br><br>Positive Assoziation mit Luftfeuchtigkeit<br>(Suizid durch Hinabstürzen und Erhängen). |                                         |
| 26 | YY Yan [96]/2000<br>Hong Kong<br>15 Jahre                              | S<br>n= k.A.   | Temperatur,<br>Luftdruck                                                                          | Positive Assoziation mit Temperatur<br>(Maximum).<br><br>Negative Assoziation mit Luftdruck.                                                                                                   | Gilt nur für bestimmte<br>Altersgruppen |

|    |                                                                            |                    |                                                                                                       |                                                                                                                                                                                                                                                                |                                                                                                     |
|----|----------------------------------------------------------------------------|--------------------|-------------------------------------------------------------------------------------------------------|----------------------------------------------------------------------------------------------------------------------------------------------------------------------------------------------------------------------------------------------------------------|-----------------------------------------------------------------------------------------------------|
| 27 | SA Marion et al. [52]/1999<br><br>British Columbia, Kanada<br><br>11 Jahre | S<br>n= 758        | Temperatur,<br>Sonnenstunden,<br>Niederschlag                                                         | Positive Assoziation mit<br>Durchschnittstemperatur im Indexmonat.<br><br>Negative Assoziation mit<br>Durchschnittstemperatur in den<br>vorausgehenden 3 Monaten.                                                                                              | Gilt nur für Suizide bei $\geq 65$<br>Jahren                                                        |
| 28 | A Preti, P Miotto [71]/1998<br><br>Italien<br><br>11 Jahre                 | S<br>n= 43.755     | Temperatur,<br>Luftfeuchtigkeit,<br>Niederschlag,<br>Tageslicht                                       | Positive Assoziationen mit Temperatur und<br>mit Tageslicht.<br><br>Negative Assoziation mit Luftfeuchtigkeit und<br>Niederschlag.                                                                                                                             | Gilt nur für harte<br>Suizidmethoden; z.T. gegenteilige<br>Ergebnisse für weiche<br>Suizidmethoden. |
| 29 | A Preti [69]/1997<br><br>Italien<br><br>20 Jahre                           | SV, S<br>n= 68.153 | Temperatur,<br>Sonnenstunden,<br>Sonnenstrahlung,<br>Tageslicht,<br>Luftfeuchtigkeit,<br>Niederschlag | Positive Assoziationen mit Temperatur,<br>Tageslicht und Sonnenstrahlung<br><br>Negative Assoziation mit Luftfeuchtigkeit und<br>Niederschlag.                                                                                                                 | Effekt weniger ersichtlich für SV                                                                   |
| 30 | LP Kok, WF Tsoi [39]/1993<br><br>Singapur<br><br>10 Jahre                  | S<br>n= 2.889      | Temperatur,<br>Luftfeuchtigkeit,<br>Niederschlag,<br>Wind (Geschwindigkeit),<br>Sonnenstunden,        | Negative Assoziation mit Sonnenstunden<br>(Suizide insgesamt).<br><br>Positive Assoziationen mit Temperatur und<br>Luftfeuchtigkeit sowie negative Assoziationen<br>mit Luftfeuchtigkeit, Niederschlag,<br>Windgeschwindigkeit in verschiedenen<br>Subgruppen. |                                                                                                     |
| 31 | P Linkowski et al. [49]/1992<br><br>Belgien<br><br>16 Jahre                | S<br>n= k.A.       | Temperatur,<br>Sonnenstunden,<br>Luftdruck,<br>Luftfeuchtigkeit                                       | Positive Assoziation mit Luftfeuchtigkeit<br>(harte Suizidmethoden).<br><br>Negative Assoziation mit Sonnenstunden<br>(harte Suizidmethoden).<br><br>Keine Assoziationen mit meteorologischen<br>Variablen bei weichen Suizidmethoden.                         |                                                                                                     |

|    |                                                                       |                                         |                                                                                                                     |                                                                                                    |                                                                  |
|----|-----------------------------------------------------------------------|-----------------------------------------|---------------------------------------------------------------------------------------------------------------------|----------------------------------------------------------------------------------------------------|------------------------------------------------------------------|
| 32 | E Sou tre et al. [80]/1987<br>Frankreich<br>8 Jahre                   | S<br>n= 76.916                          | Temperatur,<br>Sonnenstunden,<br>Tageslicht,<br>Niederschlag                                                        | Positive Assoziation mit Temperatur,<br>Tageslicht und Sonnenstunden.                              |                                                                  |
| 33 | O Ganjavi et al. [23]/1985<br>Ontario, Kanada<br>4 Jahre              | SV, S<br>(Gef ngnisinsassen)<br>n= k.A. | Temperatur,<br>Sonnenstunden,<br>Luftfeuchtigkeit,<br>Regenfall,<br>Schnee,<br>Wind,<br>geomagnetische<br>St rungen | Positive Assoziation mit Temperatur.<br><br>Negative Assoziation mit geomagnetischen<br>St rungen. | Gilt nur f r Subgruppen und in<br>jahreszeitlicher Abh ngigkeit. |
| 34 | WW Zung, RL Green, Jr.<br>[99]/1974<br>North Carolina, USA<br>7 Jahre | SV, n= 3258<br>S, n= 3672               | Temperatur,<br>Tageslicht,<br>Niederschlag,<br>Luftfeuchtigkeit                                                     | Keine Assoziationen.                                                                               |                                                                  |

| Tabelle 4: Untersuchungen zum Einfluss meteorologischer Variablen auf Suizidhandlungen auf Basis mittlerer Jahresdaten |                                                                                    |                           |                                                                    |                                                                                                                                                                    |                                                                                                     |
|------------------------------------------------------------------------------------------------------------------------|------------------------------------------------------------------------------------|---------------------------|--------------------------------------------------------------------|--------------------------------------------------------------------------------------------------------------------------------------------------------------------|-----------------------------------------------------------------------------------------------------|
|                                                                                                                        | <b>Autor/Jahr</b>                                                                  | <b>Suizidversuch (SV)</b> | <b>Meteorologische Variablen</b>                                   | <b>Hauptergebnisse</b>                                                                                                                                             | <b>Bemerkungen</b>                                                                                  |
|                                                                                                                        | <b>Geographische Lage</b>                                                          | <b>Suizid (S)</b>         |                                                                    |                                                                                                                                                                    |                                                                                                     |
|                                                                                                                        | <b>Beobachtungszeitraum</b>                                                        | <b>Anzahl (n)</b>         |                                                                    |                                                                                                                                                                    |                                                                                                     |
| 1                                                                                                                      | TA Carleton [8]/2017<br><br>Indien<br><br>47 Jahre                                 | S<br>n= k.A.              | Temperatur,<br>Niederschlag                                        | Positive Assoziation mit höherer Temperatur während landwirtschaftlicher Vegetationsperiode.                                                                       | Ergebnisse stützen die Theorie der ökonomischen Suizide in Indien                                   |
| 2                                                                                                                      | KN Fountoulakis et al. [22]/2016<br><br>Thessaloniki, Griechenland<br><br>12 Jahre | SV, S<br>n= k.A.          | Temperatur,<br>Niederschlag                                        | Positive Assoziation mit Temperatur bei VS in Männern.<br><br>Geringe positive Assoziation mit Temperatur (und möglicherweise wenig Niederschlag) bei SV in Frauen | Keine signifikante Korrelation mit Arbeitslosigkeit.                                                |
| 3                                                                                                                      | M Oka et al. [58]/2015<br><br>Japan<br><br>30 Jahre                                | S<br>n= k.A.              | Temperatur,<br>Sonnenstunden,<br>Niederschlag                      | Negative Assoziation mit Temperatur und Sonnenstunden.<br><br>Positive Assoziation mit Niederschlag.                                                               |                                                                                                     |
| 4                                                                                                                      | X Qi et al. [72]/2014<br><br>Australien<br><br>20 Jahre                            | S<br>n= 45.293            | Temperatur,<br>Luftfeuchtigkeit,<br>Niederschlag                   | Positive Assoziation mit Temperatur.                                                                                                                               | Stärkerer Einfluss von soziodemographischen Faktoren auf Suizid als durch meteorologische Faktoren. |
| 5                                                                                                                      | N Ishii et al. [33]/2013<br><br>Japan<br><br>1 Jahr                                | S<br>n= k.A.              | Temperatur,<br>Sonnenstunden,<br>Luftfeuchtigkeit,<br>Niederschlag | Negative Assoziation mit mittlerer Jahrestemperatur im Vorjahr bei Frauen.                                                                                         |                                                                                                     |

|    |                                                    |                |                                                                                  |                                                                                                                                                                                                                                                                                                                    |                                                                                                                                               |
|----|----------------------------------------------------|----------------|----------------------------------------------------------------------------------|--------------------------------------------------------------------------------------------------------------------------------------------------------------------------------------------------------------------------------------------------------------------------------------------------------------------|-----------------------------------------------------------------------------------------------------------------------------------------------|
| 6  | S Helama et al. [28]/2013<br>Finnland<br>258 Jahre | S<br>n= 94.356 | Temperatur                                                                       | Positive Assoziation mit Temperatur.                                                                                                                                                                                                                                                                               | Signifikante Assoziation bis zur Einführung des Nationalen Suizidprogramms 1990, seither trotz steigender Temperaturen, sinkende Suizidraten. |
| 7  | K Inoue et al. [32]/2012<br>Japan<br>32 Jahre      | S<br>n= k.A.   | Temperatur,<br>Sonnenstunden,<br>Luftdruck,<br>Luftfeuchtigkeit,<br>Niederschlag | Negative Assoziation mit Temperatur bei Frauen (in den fünf Präfekturen mit den höchsten Suizidraten sowie in den drei Präfekturen mit den niedrigsten Suizidraten).<br><br>Positive Assoziationen mit Luftfeuchtigkeit sowie mit Sonnenstunden bei Frauen (in den drei Präfekturen mit den höchsten Suizidraten). |                                                                                                                                               |
| 8  | JF Tsai, W Cho [88]/2011<br>Taiwan<br>34 Jahre     | S<br>n= 79.340 | Temperatur,<br>Niederschlag,<br>Sonnenstunden                                    | Keine Assoziationen.                                                                                                                                                                                                                                                                                               |                                                                                                                                               |
| 9  | JF Tsai [87]/2010<br>Taiwan<br>9 Jahre             | S<br>n= 22.368 | Temperatur,<br>Niederschlag,<br>Sonnenstunden                                    | Negative Assoziation mit Temperatur.<br><br>Positive Assoziation mit Sonnenstunden.                                                                                                                                                                                                                                | Stärkerer Einfluss von soziodemographischen Faktoren auf Suizid als durch meteorologische Faktoren.                                           |
| 10 | R Ruuhela et al. [75]/2009<br>Finnland<br>35 Jahre | S<br>n= 43.393 | Temperatur,<br>Sonnenstunden,<br>Sonnenstrahlung,<br>Niederschlag                | Positive Assoziation mit verminderter Sonnenstrahlung.                                                                                                                                                                                                                                                             | Zusätzliche Analyse auf Basis von Monatsdaten (vgl. Tabelle 3).                                                                               |

|    |                                                                                   |              |                                                                       |                                                                                                                         |                                                                                 |
|----|-----------------------------------------------------------------------------------|--------------|-----------------------------------------------------------------------|-------------------------------------------------------------------------------------------------------------------------|---------------------------------------------------------------------------------|
| 11 | N Nicholls et al. [56]/2006<br><br>New South Wales,<br>Australien<br><br>38 Jahre | S<br>n= k.A. | Niederschlag                                                          | Positive Assoziation mit niedrigem Niederschlag.                                                                        |                                                                                 |
| 12 | T Terao et al. [83]/2002<br><br>Japan<br><br>1 Jahr                               | S<br>n= k.A. | Temperatur,<br>Sonnenstunden                                          | Negative Assoziation mit Sonnenstunden.                                                                                 |                                                                                 |
| 13 | D Lester [44]/1999<br><br>62 Nationen<br><br>1 Jahr                               | S<br>n= k.A. | Nicht spezifiziert                                                    | Negative Assoziation mit Temperatur.<br><br>Positive Assoziation mit Niederschlag.                                      |                                                                                 |
| 14 | A Preti [68]/1998<br><br>Italien<br><br>8 - 20 Jahre                              | S<br>n= k.A. | Temperatur,<br>Luftfeuchtigkeit,<br>Niederschlag,<br>Sonnenstrahlung  | Negative Assoziation mit Luftfeuchtigkeit,<br>Niederschlag und Sonnenstrahlung.<br><br>Nord-Süd-Gefälle in Suizidraten. | Alter als Confounder<br>identifiziert.                                          |
| 15 | E Sou tre et al. [81]/1990<br><br>Frankreich<br><br>2 Jahre                       | S<br>n= k.A. | Temperatur,<br>Niederschlag,<br>Sonnenstunden,<br>Temperaturamplitude | Negative Assoziation mit Temperatur,<br>Sonnenstunden und Temperaturamplitude                                           | Soziodemographische Faktoren<br>als Confounder identifiziert.                   |
| 16 | D Lester [45]/1986<br><br>USA<br><br>1 Jahr                                       | S<br>n= k.A. | Temperatur,<br>Niederschlag                                           | Positive Assoziation mit Temperatur.<br><br>Negative Assoziation mit Niederschlag.                                      | Assoziation nicht signifikant nach<br>Kontrolle von Breiten- und<br>L ngengrad. |



## Literatur zu den Tabellen

1. Ajdacic-Gross V, Lauber C, Sansossio R et al. (2007) Seasonal associations between weather conditions and suicide – evidence against a classic hypothesis. *Am J Epidemiol* 165:561-569
2. Akkaya-Kalayci T, Vyssoki B, Winkler D et al. (2017) The effect of seasonal changes and climatic factors on suicide attempts of young people. *BMC Psychiatry* 17:365
3. Asirdizer M, Kartal E, Etili Y et al. (2018) The effect of altitude and climate on the suicide rates in turkey. *J Forensic Leg Med* 54:91-95
4. Bando DH, Teng CT, Volpe FM et al. (2017) Suicide and meteorological factors in sao paulo, brazil, 1996-2011: A time series analysis. *Braz J Psychiatry* 39:220-227
5. Barker A, Hawton K, Fagg J et al. (1994) Seasonal and weather factors in parasuicide. *Br J Psychiatry* 165:375-380
6. Breuer H-WM, Breuer J, Fischbach-Breuer BR (1986) Social, toxicological and meteorological data on suicide attempts. *Eur Arch Psychiatry Neurol Sci* 235:367-370
7. Breuer HW, Fischbach-Breuer BR, Breuer J et al. (1984) Suizid und wetter. *Dtsch Med Wochenschr* 109:1716-1720
8. Carleton TA (2017) Crop-damaging temperatures increase suicide rates in india. *Proc Natl Acad Sci U S A* 114:8746-8751
9. Chiu LP (1988) Do weather, day of the week, and address affect the rate of attempted suicide in hong kong? *Soc Psychiatry Psychiatr Epidemiol* 23:229-235
10. Deisenhammer EA, Kemmler G, Parson P (2003) Association of meteorological factors with suicide. *Acta Psychiatr Scand* 108:455-459
11. Didyk LA, Gorgo YP, Dirckx JJJ et al. (2010) The effects of slight atmospheric pressure fluctuations on the occurrence of emergency transport due to suicidal injuries. *Health* 02:448-453
12. Digon E, Bock HB (1966) Suicides and climatology. *Arch Environ Health* 12:279-286
13. Dixon KW, Shulman MD (1983) A statistical investigation into the relationship between meteorological parameters and suicide. *Int J Biometeorol* 27:93-105
14. Dixon PG, Kalkstein AJ (2018) Where are weather-suicide associations valid? An examination of nine us counties with varying seasonality. *Int J Biometeorol* 62:685-697
15. Dixon PG, McDonald AN, Scheitlin KN et al. (2007) Effects of temperature variation on suicide in five u.s. Counties, 1991-2001. *Int J Biometeorol* 51:395-403
16. Dixon PG, Sinyor M, Schaffer A et al. (2014) Association of weekly suicide rates with temperature anomalies in two different climate types. *Int J Environ Res Public Health* 11:11627-11644
17. Doganay Z, Sunter AT, Guz H et al. (2003) Climatic and diurnal variation in suicide attempts in the ed. *Am J Emerg Med* 21:271-275
18. Eisenbach C, Ungur AL, Unger J et al. (2008) Admission to intensive care for parasuicide by self-poisoning: Variation by time cycles, climate and the lunar cycle. *Psychiatry Res* 161:177-184
19. Fernandez-Arteaga V, Tovilla-Zarate CA, Fresan A et al. (2016) Association between completed suicide and environmental temperature in a mexican population, using the knowledge discovery in database approach. *Comput Methods Programs Biomed* 135:219-224
20. Fernandez-Nino JA, Florez-Garcia VA, Astudillo-Garcia CI et al. (2018) Weather and suicide: A decade analysis in the five largest capital cities of colombia. *Int J Environ Res Public Health* 15:1313
21. Flosz EF (1970) Zur epidemiologie und meteoropathologie des suizidgeschehens im kreis wernigerode. *Z Gesamte Hyg* 16:124-133
22. Fountoulakis KN, Savopoulos C, Zannis P et al. (2016) Climate change but not unemployment explains the changing suicidality in thessaloniki greece (2000-2012). *J Affect Disord* 193:331-338
23. Ganjavi O, Schell B, Cachon J-C et al. (1985) Geophysical variables and behavior: Xxix. Impact of atmospheric conditions on occurrences of individual violence among canadian penitentiary populations. *Percept Mot Skills* 61:259-275

24. Geltzer A, Geltzer A, Dunford R et al. (2000) Effects of weather on incidence of attempted suicide by carbon monoxide poisoning. *Undersea Hyperb Med* 27:9-14
25. Gostynski M, Maczynski B, Marcinkowski JT (1975) [meteorotropic activity of the weather conditions and their role in suicide epidemiology.]. *Zentralbl Bakteriol Orig B* 161:158-164
26. Grjibovski AM, Kozhakhmetova G, Kosbayeva A et al. (2013) Associations between air temperature and daily suicide counts in astana, kazakhstan. *Medicina (Kaunas)* 49:379-385
27. Grove O, Lynge J (1979) Suicide and attempted suicide in greenland. A controlled study in nuuk (godthaab). *Acta Psychiatr Scand* 60:375-391
28. Helama S, Holopainen J, Partonen T (2013) Temperature-associated suicide mortality: Contrasting roles of climatic warming and the suicide prevention program in finland. *Environ Health Prev Med* 18:349-355
29. Hiltunen L, Haukka J, Ruuhela R et al. (2014) Local daily temperatures, thermal seasons, and suicide rates in finland from 1974 to 2010. *Environ Health Prev Med* 19:286-294
30. Hiltunen L, Ruuhela R, Ostamo A et al. (2012) Atmospheric pressure and suicide attempts in helsinki, finland. *Int J Biometeorol* 56:1045-1053
31. Holopainen J, Helama S, Partonen T (2014) Does diurnal temperature range influence seasonal suicide mortality? Assessment of daily data of the helsinki metropolitan area from 1973 to 2010. *Int J Biometeorol* 58:1039-1045
32. Inoue K, Nishimura Y, Fujita Y et al. (2012) The relationship between suicide and five climate issues in a large-scale and long-term study in japan. *West Indian Med J* 61:532-537
33. Ishii N, Terao T, Araki Y et al. (2013) Risk factors for suicide in japan: A model of predicting suicide in 2008 by risk factors of 2007. *J Affect Disord* 147:352-354
34. Jee HJ, Cho CH, Lee YJ et al. (2017) Solar radiation increases suicide rate after adjusting for other climate factors in south korea. *Acta Psychiatr Scand* 135:219-227
35. Jessen G, Jensen BF, Steffensen P (1998) Seasons and meteorological factors in suicidal behaviour. *Arch Suicide Res* 4:263-280
36. Kadotani H, Nagai Y, Sozu T (2014) Railway suicide attempts are associated with amount of sunlight in recent days. *J Affect Disord* 152-154:162-168
37. Kim Y, Kim H, Honda Y et al. (2016) Suicide and ambient temperature in east asian countries: A time-stratified case-crossover analysis. *Environ Health Perspect* 124:75-80
38. Kim Y, Kim H, Kim DS (2011) Association between daily environmental temperature and suicide mortality in korea (2001-2005). *Psychiatry Res* 186:390-396
39. Kok LP, Tsoi WF (1993) Season, climate and suicide in singapore. *Med Sci Law* 33:247-252
40. Kordic M, Babic D, Petrov B et al. (2010) The meteorological factors associated with suicide. *Coll Antropol* 34 Suppl 1:151-155
41. Kurokouchi M, Miyatake N, Kinoshita H et al. (2015) Correlation between suicide and meteorological parameters. *Medicina (Kaunas)* 51:363-367
42. Lambert G, Reid C, Kaye D et al. (2003) Increased suicide rate in the middle-aged and its association with hours of sunlight. *Am J Psychiatry* 160:793-795
43. Lee HC, Lin HC, Tsai SY et al. (2006) Suicide rates and the association with climate: A population-based study. *J Affect Disord* 92:221-226
44. Lester D (1999) Climatic data and national suicide and homicide rates. *Percept Mot Skills* 89:1036
45. Lester D (1986) Suicide and homicide rates: Their relationship to latitude and longitude and to the weather. *Suicide Life Threat Behav* 16:356-359
46. Leung CM, Chung WSD, So EP (2002) Burning charcoal: An indigenous method of committing suicide in hong kong. *J Clin Psychiatry*
47. Likhvar V, Honda Y, Ono M (2011) Relation between temperature and suicide mortality in japan in the presence of other confounding factors using time-series analysis with a semiparametric approach. *Environ Health Prev Med* 16:36-43
48. Lin HC, Chen CS, Xirasagar S et al. (2008) Seasonality and climatic associations with violent and nonviolent suicide: A population-based study. *Neuropsychobiology* 57:32-37
49. Linkowski P, Martin F, De Maertelaer V (1992) Effect of some climatic factors on violent and non-violent suicides in belgium. *J Affect Disord* 25:161-166
50. Maes M, De Meyer F, Thompson P et al. (1994) Synchronized annual rhythms in violent suicide rate, ambient temperature and the light-dark span. *Acta Psychiatr Scand* 90:391-396

51. Makris GD, Reutfors J, Larsson R et al. (2016) Serotonergic medication enhances the association between suicide and sunshine. *J Affect Disord* 189:276-281
52. Marion SA, Agbayewa MO, Wiggins S (1999) The effect of season and weather on suicide rates in the elderly in british columbia. *Can J Public Health* 90:418-422
53. Müller H, Biermann T, Renk S et al. (2011) Higher environmental temperature and global radiation are correlated with increasing suicidality—a localized data analysis. *Chronobiol Int* 28:949-957
54. Nakaji S, Parodi S, Fontana V et al. (2004) Seasonal changes in mortality rates from main causes of death in japan (1970-1999). *Eur J Epidemiol* 19:905-913
55. Nejar KA, Bensenor IM, Lotufo PA (2007) Sunshine and suicide at the tropic of capricorn, sao paulo, brazil, 1996-2004. *Rev Saude Publica* 41:1062-1064
56. Nicholls N, Butler CD, Hanigan I (2006) Inter-annual rainfall variations and suicide in new south wales, australia, 1964-2001. *Int J Biometeorol* 50:139-143
57. Obersteg JI, Marzetta B (1957) [the question of suicide and weather]. *Dtsch Z Gesamte Gerichtl Med* 46:18-26
58. Oka M, Kubota T, Tsubaki H et al. (2015) Analysis of impact of geographic characteristics on suicide rate and visualization of result with geographic information system. *Psychiatry Clin Neurosci* 69:375-382
59. Oravec R, Czigler B, Moore M (2006) The transformation of suicide fluctuation in slovenia. *Arch Suicide Res* 10:69-76
60. Page LA, Hajat S, Kovats RS (2007) Relationship between daily suicide counts and temperature in england and wales. *Br J Psychiatry* 191:106-112
61. Papadopoulos FC, Frangakis CE, Skalkidou A et al. (2005) Exploring lag and duration effect of sunshine in triggering suicide. *J Affect Disord* 88:287-297
62. Partonen T, Haukka J, Pirkola S et al. (2004) Time patterns and seasonal mismatch in suicide. *Acta Psychiatr Scand* 109:110-115
63. Partonen T, Haukka J, Viilo K et al. (2004) Cyclic time patterns of death from suicide in northern finland. *J Affect Disord* 78:11-19
64. Patscheider H (1958) Föhn und selbstmord. *Dtsch Z Gesamte Gerichtl Med* 47:271-275
65. Petridou E, Papadopoulos FC, Frangakis CE et al. (2002) A role of sunshine in the triggering of suicide. *Epidemiology* 13:106-109
66. Pokorny AD (1966) Suicide and weather. Effect of barometric pressure and humidity. *Arch Environ Health* 13:255-256
67. Pokorny AD, Davis F, Harberson W (1963) Suicide, suicide attempts, and weather. *Am J Psychiatry* 120:377-381
68. Preti A (1998) The influence of climate on suicidal behaviour in italy. *Psychiatry Res* 78:9-19
69. Preti A (1997) The influence of seasonal change on suicidal behaviour in italy. *J Affect Disord* 44:123-130
70. Preti A, Lentini G, Maugeri M (2007) Global warming possibly linked to an enhanced risk of suicide: Data from italy, 1974–2003. *J Affect Disord* 102:19-25
71. Preti A, Miotto P (1998) Seasonality in suicides: The influence of suicide method, gender and age on suicide distribution in italy. *Psychiatry Res* 81:219-231
72. Qi X, Hu W, Mengersen K et al. (2014) Socio-environmental drivers and suicide in australia: Bayesian spatial analysis. *BMC Public Health* 14:681
73. Qi X, Hu W, Page A et al. (2015) Associations between climate variability, unemployment and suicide in australia: A multicity study. *BMC Psychiatry* 15:114
74. Qi X, Tong S, Hu W (2009) Preliminary spatiotemporal analysis of the association between socio-environmental factors and suicide. *Environ Health* 8:46
75. Ruuhela R, Hiltunen L, Venalainen A et al. (2009) Climate impact on suicide rates in finland from 1971 to 2003. *Int J Biometeorol* 53:167-175
76. Salib E (1997) Elderly suicide and weather conditions: Is there a link? *Int J Geriatr Psychiatry* 12:937-941
77. Salib E, Gray N (1997) Weather conditions and fatal self-harm in north cheshire 1989–1993. *Br J Psychiatry* 171:473-477
78. Santurtun M, Sanchez-Lorenzo A, Del Real A et al. (2018) Association between suicide and environmental variables in the north of spain: A 14-year analysis. *Cult Med Psychiatry* 42:647-653

79. Seregi B, Kapitany B, Maroti-Agots A et al. (2017) Weak associations between the daily number of suicide cases and amount of daily sunlight. *Prog Neuropsychopharmacol Biol Psychiatry* 73:41-48
80. Souêtre E, Salvati E, Belugou J et al. (1987) Seasonality of suicides: Environmental, sociological and biological covariations. *J Affect Disord* 13:215-225
81. Souêtre E, Wehr TA, Douillet P et al. (1990) Influence of environmental factors on suicidal behavior. *Psychiatry Res* 32:253-263
82. Talaei A, Hedjazi A, Ardani AR et al. (2014) The relationship between meteorological conditions and homicide, suicide, rage, and psychiatric hospitalization. *J Forensic Sci* 59:1397-1402
83. Terao T, Soeda S, Yoshimura R et al. (2002) Effect of latitude on suicide rates in japan. *Lancet* 360:1892
84. Tietjen GH, Kripke DF (1994) Suicides in california (1968-1977): Absence of seasonality in los angeles and sacramento counties. *Psychiatry Res* 53:161-172
85. Toro K, Dunay G, Bartholy J et al. (2009) Relationship between suicidal cases and meteorological conditions. *J Forensic Leg Med* 16:277-279
86. Tromp SW, Bouma JJ (1973) Study of the possible relationship between atmospheric environment, suicide and suicide attempts in the western part of the netherlands (period 1954-1969). *Biometeorological Research Centre*
87. Tsai JF (2010) Socioeconomic factors outweigh climate in the regional difference of suicide death rate in taiwan. *Psychiatry Res* 179:212-216
88. Tsai JF, Cho W (2011) The secular trend of suicide rate and the socio-economic, media, and climatic factors in taiwan, 1976-2009: A population-based study. *J Affect Disord* 129:270-274
89. Tsai JF, Cho W (2012) Temperature change dominates the suicidal seasonality in taiwan: A time-series analysis. *J Affect Disord* 136:412-418
90. Vyssoki B, Kapusta ND, Praschak-Rieder N et al. (2014) Direct effect of sunshine on suicide. *JAMA Psychiatry* 71:1231-1237
91. Vyssoki B, Praschak-Rieder N, Sonneck G et al. (2012) Effects of sunshine on suicide rates. *Compr Psychiatry* 53:535-539
92. Wang YT, Wang D, Wang XY (1997) Suicide and meteorological factors in huhhot, inner mongolia. *Crisis* 18:115-117
93. White RA, Azrael D, Papadopoulos FC et al. (2015) Does suicide have a stronger association with seasonality than sunlight? *BMJ Open* 5:e007403
94. Williams MN, Hill SR, Spicer J (2015) Will climate change increase or decrease suicide rates? The differing effects of geographical, seasonal, and irregular variation in temperature on suicide incidence. *Clim Change* 130:519-528
95. Wu YW, Chen CK, Wang LJ (2014) Is suicide mortality associated with meteorological and socio-economic factors? An ecological study in a city in taiwan with a high suicide rate. *Psychiatr Danub* 26:152-158
96. Yan YY (2000) Geophysical variables and behavior: Lxxxxix. The influence of weather on suicide in hong kong. *Percept Mot Skills* 91:571-577
97. Yang AC, Tsai SJ, Huang NE (2011) Decomposing the association of completed suicide with air pollution, weather, and unemployment data at different time scales. *J Affect Disord* 129:275-281
98. Zerbini T, Gianvecchio VaP, Regina D et al. (2018) Suicides by hanging and its association with meteorological conditions in sao paulo. *J Forensic Leg Med* 53:22-24
99. Zung WW, Green RL, Jr. (1974) Seasonal variation of suicide and depression. *Arch Gen Psychiatry* 30:89-91
